# Supplementary material for: Impact of time-to-treatment on survival for advanced non-small cell lung cancer patients in the Netherlands: a nationwide observational cohort study
Source: HighWire-hosted journal article supplement (doi:10.1136/thoraxjnl-2021-218059), 2022-04-21
Supplement: thoraxjnl-2021-218059supp001_data_supplement.pdf [file thoraxjnl-2021-218059supp001_data_supplement.pdf]

Supplementary File 1. Multivariable Cox regression clinical stage III and IV; Adjusted hazard ratios [aHR(95% CI)] for mortality associated with time-to-treatment:

| Factors                               | Stage III chemoradiotherapy<br>(N=2772) |         | Stage III radiotherapy<br>(N=1359) |         | Stage III systemic therapy<br>(N=907) |         | Stage IV systemic therapy<br>(N=5268) |         |
|---------------------------------------|-----------------------------------------|---------|------------------------------------|---------|---------------------------------------|---------|---------------------------------------|---------|
|                                       | aHR (95% CI)                            | p-value | aHR (95% CI)                       | p-value | aHR (95% CI)                          | p-value | aHR (95% CI)                          | p-value |
| Time-to-treatment<br>quartiles (days) |                                         |         |                                    |         |                                       |         |                                       |         |
| 1 (0-21)                              | Ref                                     | -       | Ref                                | -       | Ref                                   | -       | Ref                                   | -       |
| 2 (22-35)                             | 1.06 (0.92-1.23)                        | 0.4072  | 0.65 (0.51-0.82)                   | 0.0002  | 0.92 (0.73-1.15)                      | 0.4495  | 0.89 (0.82-0.98)                      | 0.0169  |
| 3 (36-49)                             | 1.09 (0.93-1.28)                        | 0.2833  | 0.55 (0.44-0.69)                   | <.0001  | 0.84 (0.66-1.07)                      | 0.1540  | 0.84 (0.77-0.93)                      | 0.0005  |
| 4 (>49)                               | 1.12 (0.95-0.99)                        | 0.1612  | 0.59 (0.47-0.73)                   | <.0001  | 0.72 (0.56-0.91)                      | 0.0062  | 0.77 (0.70-0.85)                      | <.0001  |
| Gender                                |                                         |         |                                    |         |                                       |         |                                       |         |
| Male                                  | Ref                                     | -       |                                    |         |                                       |         | Ref                                   | -       |
| Female                                | 0.77 (0.70-0.85)                        | <.0001  |                                    |         |                                       |         | 0.84 (0.79-0.89)                      | <.0001  |
| Age (years)                           |                                         |         |                                    |         |                                       |         |                                       |         |
| 18-60                                 | Ref                                     | -       | Ref                                | -       | Ref                                   | -       | Ref                                   | -       |
| 61-70                                 | 1.14 (1.00-1.29)                        | 0.0440  | 1.28 (1.03-1.59)                   | 0.0243  | 1.09 (0.90-1.32)                      | 0.4017  | 1.08 (0.99-1.16)                      | 0.0587  |
| 71-80                                 | 1.25 (1.09-1.43)                        | 0.0016  | 1.63 (1.32-2.01)                   | <.0001  | 1.23 (1.01-1.50)                      | 0.0446  | 1.16 (1.07-1.26)                      | 0.0003  |
| 80+                                   | 1.76 (1.38-2.25)                        | <.0001  | 2.15 (1.71-2.70)                   | <.0001  | 1.06 (0.77-1.44)                      | 0.7334  | 1.53 (1.31-1.78)                      | <.0001  |
| Socioeconomic status                  |                                         |         |                                    |         |                                       |         |                                       |         |
| Low                                   | Ref                                     | -       | Ref                                | -       |                                       |         |                                       |         |
| Intermediate                          | 0.88 (0.78-0.99)                        | 0.0357  | 1.10 (0.94-1.28)                   | 0.2372  |                                       |         |                                       |         |
| High                                  | 0.99 (0.87-1.12)                        | 0.8385  | 0.84 (0.71-0.99)                   | 0.0393  |                                       |         |                                       |         |
| Year of diagnosis                     |                                         |         |                                    |         |                                       |         |                                       |         |
| 2014                                  |                                         |         | Ref                                | -       |                                       |         |                                       |         |
| 2015-2016                             |                                         |         | 0.92 (0.74-1.14)                   | 0.4300  |                                       |         |                                       |         |
| 2017+                                 |                                         |         | 0.76 (0.61-0.94)                   | 0.0130  |                                       |         |                                       |         |
| Performance status                    |                                         |         |                                    |         |                                       |         |                                       |         |

|                          |                  |        |                  |        |                  |        |                  |        |
|--------------------------|------------------|--------|------------------|--------|------------------|--------|------------------|--------|
| 0                        | Ref              | -      | Ref              | -      | Ref              | -      | Ref              | -      |
| 1                        | 1.24 (1.08-1.41) | 0.0016 | 1.16 (0.94-1.44) | 0.1778 | 1.37 (1.12-1.69) | 0.0028 | 1.22 (1.12-1.32) | <.0001 |
| 2                        | 1.99 (1.57-2.52) | <.0001 | 1.70 (1.35-2.15) | <.0001 | 1.96 (1.46-2.63) | <.0001 | 1.71 (1.50-1.94) | <.0001 |
| 3+4                      | 1.70 (0.93-3.13) | 0.0855 | 2.47 (1.86-3.29) | <.0001 | 1.12 (0.55-2.28) | 0.7649 | 1.84 (1.43-2.37) | <.0001 |
| Unknown                  | 1.42 (1.26-1.61) | <.0001 | 1.26 (1.01-1.56) | 0.0396 | 1.51 (1.24-1.83) | <.0001 | 1.34 (1.24-1.45) | <.0001 |
| Histology                |                  |        |                  |        |                  |        |                  |        |
| Adenocarcinoma           | Ref              | -      | Ref              | -      | Ref              | -      | Ref              | -      |
| Squamous                 | 1.16 (1.04-1.30) | 0.0101 | 1.21 (1.04-1.41) | 0.0938 | 1.36 (1.15-1.60) | 0.0002 | 1.24 (1.14-1.35) | <.0001 |
| Large cell               | 1.35 (1.18-1.54) | <.0001 | 1.46 (1.19-1.78) | 0.0023 | 1.68 (1.38-2.04) | <.0001 | 1.32 (1.21-1.44) | <.0001 |
| Other*                   | 1.42 (0.80-2.53) | 0.2272 | 1.12 (0.68-1.85) | 0.0215 | 1.11 (0.55-2.26) | 0.7642 | 1.13 (0.84-1.52) | 0.4048 |
| Clinical diagnosis       | 1.36 (0.72-2.54) | 0.3426 | 1.01 (0.81-1.28) | 0.8997 | 1.68 (0.96-2.94) | 0.0700 | 1.25 (0.65-2.41) | 0.5016 |
| Distant metastasis       |                  |        |                  |        |                  |        |                  |        |
| cM1a                     |                  |        |                  |        |                  |        | Ref              | -      |
| cM1b/cM1c                |                  |        |                  |        |                  |        | 1.37 (1.29-1.47) | <.0001 |
| Type of systemic therapy |                  |        |                  |        |                  |        |                  |        |
| Chemo/immune             |                  |        |                  |        |                  |        | Ref              | -      |
| Targeted                 |                  |        |                  |        |                  |        | 0.54 (0.50-0.58) | <.0001 |

\*Other: Rare histological subtypes

Supplementary File 2. Multivariable Cox regression clinical stage IV NSCLC (subtypes of systemic therapy); Adjusted hazard ratios [aHR(95% CI)] for mortality associated with time-to-treatment:

| Factors                               | Stage IV chemo- and/or immunotherapy<br>(N=3715) |         | Stage IV targeted therapy<br>(N=1553) |         |
|---------------------------------------|--------------------------------------------------|---------|---------------------------------------|---------|
|                                       | aHR (95% CI)                                     | p-value | aHR (95% CI)                          | p-value |
| Time-to-treatment<br>quartiles (days) |                                                  |         |                                       |         |
| 1 (0-21)                              | Ref                                              | -       | Ref                                   | -       |
| 2 (22-35)                             | 0.87 (0.79-0.97)                                 | 0.0081  | 0.97 (0.81-1.16)                      | 0.7110  |
| 3 (36-49)                             | 0.80 (0.72-0.89)                                 | <.0001  | 0.95 (0.78-1.15)                      | 0.5900  |
| 4 (>49)                               | 0.72 (0.64-0.81)                                 | <.0001  | 0.96 (0.79-1.17)                      | 0.7004  |
| Gender                                |                                                  |         |                                       |         |
| Male                                  | Ref                                              | -       | Ref                                   | -       |
| Female                                | 0.85 (0.79-0.91)                                 | <.0001  | 0.84 (0.74-0.95)                      | 0.0055  |
| Age (years)                           |                                                  |         |                                       |         |
| 18-60                                 | Ref                                              | -       | Ref                                   | -       |
| 61-70                                 | 1.03 (0.95-1.13)                                 | 0.4726  | 1.27 (1.08-1.50)                      | 0.0047  |
| 71-80                                 | 1.14 (1.04-1.25)                                 | 0.0073  | 1.27 (1.07-1.51)                      | 0.0058  |
| 80+                                   | 1.33 (1.09-1.64)                                 | 0.0059  | 1.98 (1.54-2.54)                      | <.0001  |
| Socioeconomic status                  |                                                  |         |                                       |         |
| Low                                   | Ref                                              | -       |                                       |         |
| Intermediate                          | 1.05 (0.97-1.14)                                 | 0.2598  |                                       |         |
| High                                  | 0.90 (0.83-0.99)                                 | 0.0266  |                                       |         |
| Performance status                    |                                                  |         |                                       |         |
| 0                                     | Ref                                              | -       | Ref                                   | -       |
| 1                                     | 1.22 (1.11-1.34)                                 | <.0001  | 1.17 (0.99-1.38)                      | 0.0661  |
| 2                                     | 1.84 (1.58-2.14)                                 | <.0001  | 1.32 (1.03-1.70)                      | 0.0295  |

|                    |                  |        |                  |        |
|--------------------|------------------|--------|------------------|--------|
| 3+4                | 1.70 (1.21-2.37) | 0.0021 | 2.11 (1.42-3.12) | 0.0002 |
| Unknown            | 1.35 (1.24-1.48) | <.0001 | 1.27 (1.07-1.51) | 0.0069 |
| Histology          |                  |        |                  |        |
| Adenocarcinoma     | Ref              | -      | Ref              | -      |
| Squamous           | 1.22 (1.12-1.34) | <.0001 | 1.26 (0.99-1.60) | 0.0642 |
| Large cell         | 1.30 (1.18-1.43) | <.0001 | 1.48 (1.21-1.82) | 0.0002 |
| Other*             | 1.11 (0.79-1.56) | 0.5490 | 1.13 (0.62-2.06) | 0.6933 |
| Clinical diagnosis | 1.55 (0.77-3.11) | 0.2180 | 0.53 (0.07-3.82) | 0.5304 |
| Distant metastasis |                  |        |                  |        |
| cM1a               | Ref              | -      | Ref              | -      |
| cM1b/cM1c          | 1.41 (1.31-1.52) | <.0001 | 1.25 (1.09-1.42) | 0.0012 |

\*Other: Rare histological subtypes
